# Supplementary material for: Genome-Wide Identification, Characterization and Expression Analysis of Xyloglucan Endotransglucosylase/Hydrolase Genes Family in Barley (Hordeum vulgare)
Source: MDPI journal article supplement (doi:10.3390/molecules24101935), 2019-05-20
Supplement: s1 [file s1]

2UWA

1 10 20 30 40 50

η1 α1 β1

2UWA MFPNII LSIF. . . . . LHLIPILMFSSSC L.GQGFPSPGYYPSSQ. . . . . ITSLGFDQGYTNL

HvXTH22 ..MAMMQIRRPDAISHLMVIVVGAVIL LQGEAQPSPGYYPSSK. . . . . VSSTPFSQWYSTL

HvXTH23 ..MASLSL. . . . . LPAMALLLLAMAVASSDAQSPGYYPSSR. . . . . FRPVAFNRGYSNK

HvXTH24 ..MEMTA. . . . . RFLA. . . . . AAAACVWLAAAAAFD. . . . . VPTVAFEEGFSP

HvXTH25 ..MAAASA. . . . . LLMAALAVFAAAAAALD. . . . . TSPVPFDAGYAPL

HvXTH26 ..MAC. . . . . HFLLAVLLASSSWVAASSGAAADDVMVPRPTTAAALTFREGYTQL

HvXTH27 ..MAC. . . . . HFLLAVLLASSSWVAASSGAAADDVMVPRPTTAAALTFREGYTQL

HvXTH28 ..MASSSCPPPSRPSRLLPVLVATVVL LGRGGEARQ. . . . . PAPLHGVVRSMAFDEGYTQL

HvXTH29 ..MASSSVR. . . . . QPWL LLLVLLPVM. . . . . ATAAVFDDNYAPL

2UWA

η2 β2 β3 β4 β5

2UWA WGPQHQRV. . . . . DQGS LTIWLDSTSGSGFKS INRYRS GYFGANIKLQSGYITAGVITSFYLSN

HvXTH22 WGPQHQS LSPDQTALTLWMDRS SGSGFKSKRSYRNGYFGVSMKVQPGYITAGVNTAFYLSN

HvXTH23 WGPQHQT VSGDHSAITIWLDRTCGSGFKSKHAYRNGYFATRIKLPAGYITAGTNTAFYLSN

HvXTH24 FGDNLVLRARDDRARLLLDRRSGSGFISSDYLYHGFSSASTKLPRDYITAGVVVAFYLSN

HvXTH25 FGDNLVRSADGRSVTLKLDRTYTGSGFVSKSAYRHGFFGASTKLPGDYITAGVVVAFYLSN

HvXTH26 FGDSNLR LHGDGKRVHISLDERITGSGFASQGAIFYHGFSSASTKLPSDYITAGVVVAFYVSN

HvXTH27 FGDSNLR LHGDGKRVHISLDERITGSGFASQGAIFYHGFSSASTKLPSDYITAGVVVAFYMSN

HvXTH28 FGSGNLALRRREGKRVHLALDESTGSGFASQDRFLHGFSSAAVKLPADYITAGVVVAFYLSN

HvXTH29 WGADGYHLVDQGTETIRLITMDRNSGAGFHSKSTYGS GEFHMRITKVPGGYITAGVVITAFYLAS

2UWA

β6 β7 β8

2UWA NQDYPGK. HDEIDIEFLGTIPGKPYTLQTNVFI EGSGDYN.IIGREMRIHLWFDPT.QDY

HvXTH22 NEVYPGY. HDEIDIVELGTVPGEPTYTLQTNVYVRGTGDAHP IVGREMRFLWFDPT.AAF

HvXTH23 NEAHPGF. HDEVDMELGTIPGEPTYTLQTNVYVRSGDGR.IIGREMRFLWFDPT.AGF

HvXTH24 GDVYEKT. HDELDFFELGSRWGGQWRVQTNVY. . . . . GNGSTSRGREERYHLWFDPT.LAA

HvXTH25 WDEYFKN. HDELDFFELGNRRGHGWRVQTNMY. . . . . GNGSTARGREERYHLWFDPT.TYTG

HvXTH26 GDVYEKT. HDELDFFELGNVRGKEWRVQTNVY. . . . . GDGSTAVGREERYGLWFDPT.HDF

HvXTH27 GDVYEKT. HDELDFFELGNVRGKEWRVQTNVY. . . . . GDGSTAVGREERYGLWFDPT.HDF

HvXTH28 ADVYEKT. HDELDFFELGNVRGKEWRVQTNVY. . . . . GNGSTGAGREERYDLWFDPT.DDF

HvXTH29 ETPYDGSDEDEVDFFELGNVDGENITLQTNVFVNGDGD. . . . . REQRSLWFDPT.ADF

2UWA

β9 β10 β11 η3 β12 η4

2UWA HNYYAIYWT PSEIIFVDDVPIR. . . . . RYPRK. . . . . SDATFPLRPLWVYGSVWDASSWATENCKY

HvXTH22 HHYAVLWN PDEIVFLVDVPIR. . . . . RYQKK. . . . . VEATFPEREMWAYG SVWDASSWATDCKRY

HvXTH23 HNYYAILWN PDAITFFVDDVPIR. . . . . RYERK. . . . . TELTFPDRPMWAYG SIWDASSWATDHGRH

HvXTH24 HRYSLWAPTH IIFYVDVTAIR. . . . . EVVRHPGMGGDFPAKPMAYAT IWDGSAWATEGCKY

HvXTH25 HRYAIAWT PNNIVFYVDGVPPIR. . . . . EVVRVPSMGGDFPSPKPM SVYAT IWDGSAWATEGCKY

HvXTH26 HRYAILWT NRTIVFYVDGTPPIR. . . . . EVVRSEAMGAQFPSPKPM SLYAT IWDGSSWATSCKRY

HvXTH27 . . . . . FVVDGTPPIR. . . . . EVVRSEAMGAQFPSPKPM SLYAT IWDGSSWATSCKRY

HvXTH28 HHYSILWT QHRIIFYVDETPPIR. . . . . EVVRTEAMGAQFPSPKPM SLYAT IWDGSAWATLCKRY

HvXTH29 HEYKILWN PYHLVILVDVPIRVLRLNL TQGVAEYE FPAKRMVRA SLWDGSDWATDCKRT

2UWA

η5 β13 η6 η7 α2

2UWA KADYRYQPFV GKYEDFKLGSCTVEA. . . . . AS. . . . . S CNPASV.SP.YGQLSQQQVAAAM

HvXTH22 RSDYRYQPFVSGFKDFKVAGCEVGA. . . . . PA. . . . . S CRPVPA.GP.GGGLSAQQSAAM

HvXTH23 RADYRYQPFVARFDRFVVGCGPGA. . . . . PP. . . . . S CRPVRA.SPVGTGLTRQQYAAAM

HvXTH24 KVNYYKAPFASDFSDLSLRGCRVADFPASPALRIAGGDGCDLLGLMTADYAVMTPKRAAM

HvXTH25 KVDYAYAPFAAEFSDLVLSGCGAGNVADPE. . . . . G CQVDLL.THDVAVMAPAKRAAM

HvXTH26 KVEYKYAPVVAEFTDLELRGCASHDRAQPA. . . . . S CEP. . . . . EGMPARQRAAM

HvXTH27 KVEYKYAPVVAEFTDLELRGCASHDRAQPA. . . . . S CEP. . . . . EGMPARQRAAM

HvXTH28 RANYYKAPVVAEFGDLVLHACPVNRIYHSA. . . . . AAA CGTPWY.EPVAAA LSGEQRAAM

HvXTH29 KIDWGRAPEFTAGFRGFDVDA CDNAS.STPC. . . . . DSTDWNNARRHRR LSVREQAAAY

2UWA

β14 η6 η7

2UWA EWVQKNYMYNYCDDPTRDHT.LTP. . . . . EC. . . . .

HvXTH22 SWAQQRAMVYNYCQDGSKDRS.NYP. . . . . EC. . . . .

HvXTH23 RWAQQRHMVYNYCQDFRRDRS.LTP. . . . . EC. . . . .

HvXTH24 RAFRARRMTYTYCYDAARYAAGPFP. . . . . EC DNSDEERGTFWAWGESKTVVMKTRGRGRGRG

HvXTH25 RGFRQHLTYTACRDRVRKYTTTFP. . . . . EC DDLADGDSSFHLWGESSK. . . . . RRRRS

HvXTH26 ERVRRARHMTYGYCYDRARYPA.PLPE. . . . . EC RVGAEAA. . . . . MYLPSGE. . . . . ARSSDRR.RH

HvXTH27 ERVRRARHMTYGYCYDRARYPA.PLPE. . . . . EC RVGAEAA. . . . . MYLPSGE. . . . . ARSSDRR.RH

HvXTH28 SAFRRGHMSYSYCHDRRYPV.ALS. . . . . EC DVAVLPR. . . . . LFGPDGM. . . . . KYGGDRRHRR

HvXTH29 ENVRRTYMYNYCYADKDRFQNGKLEVS YTT. . . . . EC SYTT. . . . .

**2UWA**

|                |                  |
|----------------|------------------|
| <b>2UWA</b>    | .....            |
| <b>HvXTH22</b> | .....            |
| <b>HvXTH23</b> | .....            |
| <b>HvXTH24</b> | SRAGAGARGRAGAASS |
| <b>HvXTH25</b> | S.....SPLQYSSSMQ |
| <b>HvXTH26</b> | G.....KRHRRADSAL |
| <b>HvXTH27</b> | G.....KRHRRADSAL |
| <b>HvXTH28</b> | G.....GRGRRSDVVM |
| <b>HvXTH29</b> | .....            |
