# Supplementary material for: Genome-Wide Identification, Characterization and Expression Analysis of Xyloglucan Endotransglucosylase/Hydrolase Genes Family in Barley (Hordeum vulgare)
Source: MDPI journal article supplement (doi:10.3390/molecules24101935), 2019-05-20
Supplement: s1 [file s1]

|                    | 1  | 10                           |
|--------------------|----|------------------------------|
| HvEG16_Hordeum_vul | MA | SER.....DQHEHLR..            |
| TaEG16_Triticum_ae | MA | SDSESS.....DVA.PDDQHEHLR..   |
| TaEG16_Triticum_ae | MA | SDSESS.....DVA.PDDQHEHLR..   |
| OsEG16_Oryza_sativ | MA | SESECV.....AVAEPPHVHVHLH..   |
| OsEG16_Oryza_sativ | MA | SESECV.....AVAEPPHVHVHLH..   |
| OsEG16_Oryza_sativ | MA | SESECV.....AVAEPPHVHVHLH..   |
| TaEG16_Triticum_ae | MA | SECE.....VT.PDDQHEHLR..      |
| ZmEG16_Zea_mays_GR |    |                              |
| ZmEG16_Zea_mays_NP | MA | SESEAC.SWE.....PHLLH.....    |
| ZmEG16_Zea_mays_Zm | MA | SESEAC.SWE.....PHLLH.....    |
| VvEG16             | MA | D.....PSLHHEA.....           |
| PtEG16             | MA | D.....PAIHHEA.....           |
| 1UN1               | MA | AAYPWT.....                  |
| HvXTH8             | MA | KATAGAL.....                 |
| HvXTH22            | MA | .....                        |
| HvXTH20            | MA | .....                        |
| HvXTH19            | MA | .....                        |
| HvXTH18            | MA | .....                        |
| HvXTH17            | MA | .....                        |
| HvXTH23            | MA | RIVE.....                    |
| HvXTH21            | MA | SG.....PS.....               |
| HvXTH24            | MA | .....                        |
| HvXTH3             | MA | KAPSGGLAYKKAVSCALCFAPDQSI    |
| HvXTH13            | MA | PSL.....PS.....              |
| HvXTH4             | MA | PAL.....P.....               |
| HvXTH14            | MA | .....                        |
| HvXTH1             | MA | .....                        |
| HvXTH6             | MA | .....                        |
| HvXTH5             | MA | .....                        |
| HvXTH7             | MA | .....                        |
| HvXTH2             | MA | .....                        |
| HvXTH15            | MA | .....                        |
| 2UWA               | MA | M.....PPN.....               |
| HvXTH10            | MA | MMQ.....IRRPH.....           |
| HvXTH16            | MA | SL.....                      |
| HvXTH12            | MA | TARF.....                    |
| HvXTH9             | MA | CHF.....                     |
| HvXTH11            | MA | SSSSCP.....PP.....SPRPS..... |
| HORVU4Hr1G085940.2 | MA | GS.....                      |

|                    |  |                                                       |
|--------------------|--|-------------------------------------------------------|
| HvEG16_Hordeum_vul |  | PDGTEPL.....                                          |
| TaEG16_Triticum_ae |  | PEGTEPL.....                                          |
| TaEG16_Triticum_ae |  | PEGTEPL.....                                          |
| OsEG16_Oryza_sativ |  | PDGTEPL.....                                          |
| OsEG16_Oryza_sativ |  | PDGTEPL.....                                          |
| OsEG16_Oryza_sativ |  | PDGTEPL.....                                          |
| TaEG16_Triticum_ae |  | PEGTEPL.....                                          |
| ZmEG16_Zea_mays_GR |  |                                                       |
| ZmEG16_Zea_mays_NP |  | PNGTEPL.....                                          |
| ZmEG16_Zea_mays_Zm |  | PNGTEPL.....                                          |
| VvEG16             |  | QPL.....                                              |
| PtEG16             |  | QPI.....                                              |
| 1UN1               |  | LFLGMLVMVS.....GTMGAALR.....KPV.....                  |
| HvXTH8             |  | LAVVATVLLR.....GIAAAPP.....KPV.....                   |
| HvXTH22            |  | LRGSLRWL.LVLAVVVAAS.....AGKAGR.....                   |
| HvXTH20            |  | RMAVSVLAI.LLAWCALA.....AAS.....                       |
| HvXTH19            |  | RMAVSVLSI.LLATCALA.....AAS.....                       |
| HvXTH18            |  | RMGASVLSI.LLASCALA.....AAS.....                       |
| HvXTH17            |  | RMGASVLSI.LLASCALA.....AAS.....                       |
| HvXTH23            |  | LG1.VAMACLVAVAR.....AGN.....                          |
| HvXTH21            |  | RTVPCSVLPL.LLLLAVARA.....AGN.....                     |
| HvXTH24            |  | QARAYLLAS.LAAFYLVALLAI..PQVTAD.....                   |
| HvXTH3             |  | SSWGWMGMPWRRPCVGL.LACAAIAASCCCFQLQGADAAA.....SPS..... |
| HvXTH13            |  | SSSCWHSALL..VAMLVLVVM.....DQVAMAY.....                |
| HvXTH4             |  | CSRPKLLLLCVALAFLAVD.....VGRAD.....                    |
| HvXTH14            |  | PRSDLLAA.LALALLAASVL.....STGAKAD.....                 |
| HvXTH1             |  | RPSFSLHLC.LAVLALAAA.....ASEAG.....                    |
| HvXTH6             |  | QRFLAVLA.VALALSQVA.....SAKSW.....                     |
| HvXTH5             |  | RRLAVLA.VALALLQAA.....SAKSW.....                      |
| HvXTH7             |  |                                                       |
| HvXTH2             |  | KPGALVPV.VALAFALVLGL..ELVSGGN.....                    |
| HvXTH15            |  | SSVRQPWLLLL.LVLLPVMATAAV.....                         |
| 2UWA               |  | ILSIFLHL.LPILMFSSS.CL..GQGP.....P.....SPGYPPSSQIT     |
| HvXTH10            |  | DAISHL.MVIVGAVI.LL.QGEAQ.....P.....SPGYPPSSKVS        |
| HvXTH16            |  | SLIPA.MALLLLAMA.VA.SSDAQ.....P.....SPGYPPSSRFR        |
| HvXTH12            |  | .....LAAAAACVW.LAAAAAFDV.....PT.....                  |
| HvXTH9             |  | L.LAVLLASSSWVA.ASSGAAADDVMP.....RPT.....TAA           |
| HvXTH11            |  | RL.LPVLVATV..VL.LGRGGEARQ...P.....APLH.....GVVR       |
| HORVU4Hr1G085940.2 |  | LEATRVELGLAVLYLNKAE.....                              |

|                    | 20           | 30                    | 40                              |
|--------------------|--------------|-----------------------|---------------------------------|
| HvEG16_Hordeum_vul | ....ARIAVD   | YTPDACRHAPE..SG..E    | IHVITYD                         |
| TaEG16_Triticum_ae | ....ARIAVD   | YTPDACRHAPE..TG..E    | IHVITYD                         |
| TaEG16_Triticum_ae | ....ASIAVD   | YIPDACRHAPE..SG..E    | IHVITYD                         |
| OsEG16_Oryza_sativ | ....AHIAVD   | YCPEACHHASE..DG..E    | IHVITYD                         |
| OsEG16_Oryza_sativ | ....AHIAVD   | YCPEACHHASE..DG..E    | IHVITYD                         |
| OsEG16_Oryza_sativ | ....AHIAVD   | YCPEACHHASE..DG..E    | IHVITYD                         |
| TaEG16_Triticum_ae | ....ARIAVD   | YTPD.....G..E         | IHVITYD                         |
| ZmEG16_Zea_mays_GR | .....HRIA    | VDYCPEACLHERH..AG..E  | IHVITYD                         |
| ZmEG16_Zea_mays_NP | .....HRIA    | VDYCPEACLHERH..AG..E  | IHVITYD                         |
| ZmEG16_Zea_mays_Zm | .....KFAI    | VDYCPEACHTSPE..SS..T  | ITLTFD                          |
| VvEG16             | .....NQIA    | IDYTPEACTHCPE..SN..S  | ITLTYD                          |
| PtEG16             | DVAFGRNYVPT  | WAFDHIKYFNG..GN..E    | IQLHLD                          |
| 1UN1               | DVPFEKNYVPT  | WAEDHIHYVNG..GR..E    | VQLSLDK                         |
| HvXTH8             | ..GLHRDFDAV  | WGKRNRFFDE..GR..V     | VELALDR                         |
| HvXTH22            | ..FDKEFDIT   | WDGGRGKILNN..GQ..L    | LTLLDK                          |
| HvXTH20            | ..FDKEFDVT   | WDGGRGKILNN..GQ..L    | LTLLDK                          |
| HvXTH19            | ..FDKEFDVT   | WDGGRGKILNN..GQ..L    | LTLLDK                          |
| HvXTH18            | ..FDKEFDVT   | WDGGRGKILNN..GQ..L    | LTLLDK                          |
| HvXTH17            | ..FDKEFDVT   | WDGGRGKILNN..GQ..L    | LTLLDK                          |
| HvXTH23            | ..FFQDSEMS   | WDGGRGKVVDG..GR..G    | LDLTLDK                         |
| HvXTH21            | ..FYQDVDT    | WDGGRGKILGG..GD..L    | LTLLSLDR                        |
| HvXTH24            | ..MTDEVNLL   | WGNCVKQRDGT..GR..Q    | TVAAMLDR                        |
| HvXTH3             | ..FGDNFEIT   | GAKDHVKTSPD..GQ..T    | WYLSLND                         |
| HvXTH13            | ..LDDDIIEV   | WGGDHSFFYMDDAGDDEI    | LALCLDE                         |
| HvXTH4             | ..IYKDIQII   | WSADHTYFMD..GDSEA     | LALSLDF                         |
| HvXTH14            | ..FDDQFEVI   | GDRDHIGYRDDGNDKGQEF   | SLELDQ                          |
| HvXTH1             | ..FYDQFDVV   | GSGNNVRVNDGIAQ..QV..A | LTLDQ                           |
| HvXTH6             | ..LDKRFTDGT  | ..VRTGYDASGQ..QV..M   | MLNLNQ                          |
| HvXTH5             | ..LDKRFTDGT  | ..VRTGYDASGQ..QV..M   | MLNLNQ                          |
| HvXTH7             | .....        | .....                 | .....                           |
| HvXTH2             | ..FYEECDAT   | WEPQNCWTYDQ..GN..S    | LSLALVSNSSGLSSTSQLLYFSWSSPLNESM |
| HvXTH15            | ..FDDNYAPT   | WGADGYHLVDQ..GT..E    | IRLTMDR                         |
| 2UWA               | SLGFDQGYTNL  | WGPQHQRV..D..QG..S    | LTWLDS                          |
| HvXTH10            | STPFSSQWYSTL | WGPQHQSLSPD..QT..A    | LTLLWMDR                        |
| HvXTH16            | PVAFNRGYSNK  | WGPQHQTVS GD..HS..A   | ITWLDR                          |
| HvXTH12            | ..VAFEEGFSPL | FGDGNLVRARD..DR..A    | ARLLDR                          |
| HvXTH9             | ALTTFREGYTQL | FGDSNLRLHGD..GK..R    | VHISLDE                         |
| HvXTH11            | SMAFDEGYTQL  | FSGSNLALRRE..GK..R    | VHLALDE                         |
| HORVU4Hr1G085940.2 | .....        | .....AR.....          | ..DKICRAI                       |

|                    | 50                 | 60             | 70       | 80        | 90           |
|--------------------|--------------------|----------------|----------|-----------|--------------|
| HvEG16_Hordeum_vul | ..RGGARWRSRSLRFLP  | GGAVAAVRA      | PAGD     | TTGLNLYNL | YLS          |
| TaEG16_Triticum_ae | ..RGGARWRSRSLRFLP  | GGAVAAVRA      | PAGD     | TAGLNYNL  | YLS          |
| TaEG16_Triticum_ae | ..RGGARWRSRSLRFLP  | GGAVAAVRA      | PAGD     | TAGLNYNL  | YLS          |
| OsEG16_Oryza_sativ | ..RGGARWRSRCRFLP   | GGAVAA         | IRAPAGD  | TAGLNYNL  | YLS          |
| OsEG16_Oryza_sativ | ..RGGARWRSRCRFLP   | GGAVAA         | IRAPAGD  | TAGLNYNL  | YLS          |
| OsEG16_Oryza_sativ | ..RGGARWRSRCRFLP   | GGAVAA         | IRAPAGD  | TAGLNYNL  | YLS          |
| TaEG16_Triticum_ae | ..GARWRSRGRFLP     | GCABAAT        | VRAPAGD  | TAGLNYNL  | YLS          |
| ZmEG16_Zea_mays_GR | .....              | .....          | .....    | .....     | .....        |
| ZmEG16_Zea_mays_NP | ..RGGARWRSCCRFLP   | GSAVATT        | IRAPAGD  | TSGLNYNI  | YLS          |
| ZmEG16_Zea_mays_Zm | ..RGGARWRSCCRFLP   | GSAVATT        | IRAPAGD  | TSGLNYNI  | YLS          |
| VvEG16             | ..RGSRWRSSTTRFQYG  | ..TFSSL        | IQCCKGN  | TSGLNFNI  | YLS          |
| PtEG16             | ..RGGARWRSSTTRFLYG | ..TFSSL        | IQCCKGN  | TSGLNFNI  | YLS          |
| 1UN1               | ..YTGTGFQSKGSYLF   | ..HFSM         | QMKLVPGD | SAGTVTAF  | YLS          |
| HvXTH8             | ..TTGTGFQTRGSYLF   | ..HFSM         | IKLVG    | GD        | SAGTVTAF     |
| HvXTH22            | ..ETGSRLQSKDRYLF   | ..RFDL         | IRLVAGE  | SAGTITSF  | YICTG        |
| HvXTH20            | ..VSGSGFQSKHEYLF   | ..KIDM         | QKLVPGN  | SAGTVTAY  | YLS          |
| HvXTH19            | ..VSGSGFQSKHEYLF   | ..KIDM         | QKLVPGN  | SAGTVTAY  | YLS          |
| HvXTH18            | ..VSGSGFQSKHEYLF   | ..KIDM         | QKLVPGN  | SAGTVTAY  | YLS          |
| HvXTH17            | ..VSGSGFQSKREYLF   | ..KIDM         | QKLVPGN  | SAGTVTAY  | YLS          |
| HvXTH23            | ..TS               | GSGFQSKSEYLF   | ..KIDM   | IKLVPGN   | SAGTVTTF     |
| HvXTH21            | ..AS               | GSGFQSKNQYLYG  | ..RFDM   | QKLVPGD   | SAGTVATF     |
| HvXTH24            | ..WTTSG            | FSSKIKYLF      | ..RIDM   | EIKLMPGN  | SAGTVTTF     |
| HvXTH3             | ..KT               | GVGFQTKQKYLFG  | ..WFSM   | KLVGND    | SAGVVTAY     |
| HvXTH13            | ..TH               | GSGFHTKEAYLYA  | ..RFDV   | LMVDPDN   | SAGTVTTL     |
| HvXTH4             | ..NR               | GSAFKNNDMYLYA  | ..RID    | IKLVEGN   | SAGTVCTV     |
| HvXTH14            | ..ES               | GSGFQSKAKYLF   | ..EFQV   | RMKLVGND  | SAGTVTSF     |
| HvXTH1             | ..GNG              | GSGFQSKDKYLYG  | ..EFSV   | QMKLVGND  | SAGTVTSF     |
| HvXTH6             | ..QSGAAG           | FNSKQYLYG      | ..EFSI   | QMKLVGND  | SAGTVSCF     |
| HvXTH5             | ..QSGAAG           | FNSKQYLYG      | ..EFSI   | QMKLVGND  | SAGTVSCF     |
| HvXTH7             | .....              | .....          | .....    | .....     | .....        |
| HvXTH2             | CGCS               | GSMIRSKRQFIYG  | ..TVSTM  | IQLVKGD   | SAGTVTTY     |
| HvXTH15            | ..NS               | GAGFHSKSTYSG   | ..FFHM   | RIKVP     | GYTAGVVTAF   |
| 2UWA               | ..TS               | GSGFQSKINRYRSG | ..YFGA   | NIKLVGND  | GYTAGVITSF   |
| HvXTH10            | ..SS               | GSGFQSKINRYRSG | ..YFGA   | NIKLVGND  | GYTAGVITSF   |
| HvXTH16            | ..TC               | GSGFQSKKHAYRNG | ..YFATR  | IKLVGND   | GYTAGVNTAF   |
| HvXTH12            | ..RS               | GSGFISSDYLYHG  | ..FFSA   | IKLVGND   | GYTAGVVVAF   |
| HvXTH9             | ..RT               | GSGFASQGAFFHG  | ..FFSA   | IKLVGND   | GYTAGVVVAF   |
| HvXTH11            | ..ST               | GSGFASQDRFLHG  | ..FFSA   | IKLVGND   | GYTAGVVVAF   |
| HORVU4Hr1G085940.2 | ..QY               | GSKFISNGQPGTA  | QNVDKS   | TTTL      | ..ARKVFERLLK |

|                    | 100                                                          | 110   |
|--------------------|--------------------------------------------------------------|-------|
| HvEG16_Hordeum_vul | DFEFLGNDKR...AV                                              | QTNFF |
| TaEG16_Triticum_ae | DFEFLGNHKKR...AV                                             | QTNFF |
| TaEG16_Triticum_ae | DFEFLGNDKR...AV                                              | QTNFF |
| OsEG16_Oryza_sativ | DFEFLGHDKC...AV                                              | QTNFH |
| OsEG16_Oryza_sativ | DFEFLGHDKC...AV                                              | QTNFH |
| OsEG16_Oryza_sativ | DFEFLGHDKC...AV                                              | QTNFH |
| TaEG16_Triticum_ae | DFEFLGNDKR...AV                                              | QTNLF |
| ZmEG16_Zea_mays_GR |                                                              |       |
| ZmEG16_Zea_mays_NP | DFEFLGHDKR...AV                                              | QTNYY |
| ZmEG16_Zea_mays_Zm | DFEFLGHDKR...AV                                              | QTNYY |
| VvEG16             | DFEFLGDKR...IV                                               | QTNYY |
| PtEG16             | DFEFLGDKT...IV                                               | QTNYY |
| 1UN1               | DFEFLGNRT...GQPYIL                                           | QTNVF |
| HvXTH8             | DFEFLGNRT...GQPYIL                                           | QTNVF |
| HvXTH22            | DFEFLGNVS...GEPYIL                                           | HTNIF |
| HvXTH20            | DFEFLGNVT...GEPYTL                                           | HTNVF |
| HvXTH19            | DFEFLGNVT...GEPYTL                                           | HTNVF |
| HvXTH18            | DFEFLGNVT...GEPYTL                                           | HTNVF |
| HvXTH17            | DFEFLGNVT...GEPYTL                                           | HTNVF |
| HvXTH23            | DFEFLGNVT...GEPYTL                                           | HTNVF |
| HvXTH21            | DFEFLGNAS...GQPYTV                                           | HTNVY |
| HvXTH24            | DLEFLGNST...GNPYTL                                           | HTNVY |
| HvXTH3             | DFEFLGNRT...GEPYII                                           | QTNVY |
| HvXTH13            | DLEFLGNVT...GEPYTL                                           | HTNIF |
| HvXTH4             | DLEFLGNST...GEPYTL                                           | HTNIF |
| HvXTH14            | DIEFMGNSS...GDPYVM                                           | NTNVW |
| HvXTH1             | DIEFMGNLS...GDPYVM                                           | NTNVW |
| HvXTH6             | DMEFMGNSS...GHPVVL                                           | NTNVW |
| HvXTH5             | DMEFMGNSS...GHPVVL                                           | NTNVW |
| HvXTH7             | DMEFMGNSSGHPVVL                                              | NTNVW |
| HvXTH2             | DFEFLGNET...GQPYTL                                           | HTNVY |
| HvXTH15            | DFEFLGNVD...GENITL                                           | QTNVF |
| 2UWA               | DIEFLGTIP...GKPYTL                                           | QTNVF |
| HvXTH10            | DVELLGTVP...GEPYTL                                           | QTNVY |
| HvXTH16            | DMEFLGTIP...GEPYTL                                           | QTNVY |
| HvXTH12            | DFEFLGSRW...GGQWRV                                           | QTNVY |
| HvXTH9             | DFEFLGNVR...GKEWRV                                           | QTNVY |
| HvXTH11            | DFEFLGNVR...GREWRV                                           | QTNVY |
| HORVU4Hr1G085940.2 | QCYVNLVLVLQWVNDLHALISPAAKGTPLTLVLLGKSKNALLSTFLFLDQFVWLGRSGIY |       |

|                    | 120                                                              | 130 | 140 | 150 | 160    |
|--------------------|------------------------------------------------------------------|-----|-----|-----|--------|
| HvEG16_Hordeum_vul | VAGSGG...GREAVHELFPDSSDGFHHYAVAWDAEAIE...WRVDGEVLRREERRD...      |     |     |     |        |
| TaEG16_Triticum_ae | VAGCGG...GREAVHELFPDSSDGFHHYAVAWGAEAIE...WRVDGE...REERRD...      |     |     |     |        |
| TaEG16_Triticum_ae | VAGCGG...GREAIHDLFPDSSDGFHHYAVAWGAEAIE...WRVDGEVLRREERRD...      |     |     |     |        |
| OsEG16_Oryza_sativ | VAGGGG...GREQIHVLPFDS SDGFHHYAIW GADAEIE...WRIDGELIRREERVA...    |     |     |     |        |
| OsEG16_Oryza_sativ | VAGGGG...GREQIHVLPFDS SDGFHHYAIW GADAEIE...WRIDGELIRREERVA...    |     |     |     |        |
| OsEG16_Oryza_sativ | VAGGGG...GREQIHVLPFDS SDGFHHYAIW GADAEIE...WRIDGELIRREERVA...    |     |     |     |        |
| TaEG16_Triticum_ae | VAGGGG...GREMVHQLFPDSSDGFHHYAVAWSAEAVE...WRVDGEVLRREERRD...      |     |     |     |        |
| ZmEG16_Zea_mays_GR |                                                                  |     |     |     | MRE... |
| ZmEG16_Zea_mays_NP | VGGNGG...GREQIHALFPDSSDGFHHYAIWDAAAIE...WRVDGELVRDRKRR...        |     |     |     |        |
| ZmEG16_Zea_mays_Zm | VGGNGG...GREQIHALFPDSSDGFHHYAIWDAAAIEWRWRVDGELVRDRKRR...         |     |     |     |        |
| VvEG16             | TAGTGG...NREAIHDLGFDCSDGFHEYV IKWGPDLIQ...WLIDGKVI RSVVRAD...    |     |     |     |        |
| PtEG16             | ASGTGG...NREEIHDLGFDCSDAFHEYV IKWCPNFIE...WLIDGKVI RSVVRAD...    |     |     |     |        |
| 1UN1               | TGGKGG...DREQRIYLWFDPTKEFHYSVLWNMYMIV...FLVDVDP IRVFKNCK...D     |     |     |     |        |
| HvXTH8             | SGGKGG...DREQRIYLWFDPTKDYSYSVLWNLYMIA...FFVDDTPI R VFKNSK...D    |     |     |     |        |
| HvXTH22            | SDGKGG...EREQQFVLWFDPTADFHYSILWNPLNII...LYIDGTP IRVFKNNE...A     |     |     |     |        |
| HvXTH20            | TQGGGG...QREQQFRLWFDPTNDFHTYSILWNPKHII...FMVDDMP IRDFKNLE...G    |     |     |     |        |
| HvXTH19            | TQGGGG...QREQQFRLWFDPTNDFHTYSILWNPKHII...FMVDDMP IRDFKNLE...G    |     |     |     |        |
| HvXTH18            | TQGGGG...QREQQFRLWFDPTNDFHTYSILWNPKHII...FMVDDMP IRDFKNLE...G    |     |     |     |        |
| HvXTH17            | TQGGGG...QREQQFRLWFDPTNDFHTYSILWNPKHII...FLVDMP IRDFRNME...G     |     |     |     |        |
| HvXTH23            | AQGGGG...QREQQFRLWFDPTKAFHTYSIIWN PQHVI...FAVDGTAI RDFKNHE...A   |     |     |     |        |
| HvXTH21            | SQGGGG...GREQQFRMWFDPTADFHYSVLWNPTHIL...FYVDGTP IREHRNREA...A    |     |     |     |        |
| HvXTH24            | ARGVGG...SREKGYRLWFDPSQDFHTYSIIWTQOYIR...FLVDNKLIR QIKNM...M     |     |     |     |        |
| HvXTH3             | RSGVGG...GREMRHSLWFDPTADFHYSILWNPKQIV...FFVDKVAIR EYRNSA...K     |     |     |     |        |
| HvXTH13            | ANGVGG...NREEQFRLWFDPTADFHYSIDWNPKRIT...ILVDGVP IR SFRNNE...E    |     |     |     |        |
| HvXTH4             | AYGVGG...GREQQFKLWFDPSAEYHTYSIWNPNRRIT...IEVDGVT IR SYDNNE...E   |     |     |     |        |
| HvXTH14            | ASGDGG...KKEHQFYLWFDPSADFHTYKIWNPKNII...FEVDGVP VR TFKKYD...A    |     |     |     |        |
| HvXTH1             | ASGDGG...KKEHQFYLWFDPTADFHYSKIWNPKNII...FQVDDVP VR TFKKYD...A    |     |     |     |        |
| HvXTH6             | ANGDGG...KKEHQFDLWFDPAADYHTYTIIWNPENIL...FKVDNLF IR SFKRFA...A   |     |     |     |        |
| HvXTH5             | ANGDGG...KKEHQFDLWFDPAADYHTYTIIWNPENIL...FKVDNLF IR SFKRFA...A   |     |     |     |        |
| HvXTH7             | VNGDGG...KKEHQFDLWFDPAADYHTYTIIWNPENIL...FKVDNLF IR SFKRFA...A   |     |     |     |        |
| HvXTH2             | AAGVGG...GKEMQFRPWFDPTDGYHNYTIAWTPCAV...WYVDGAP IR AFRNYER...T   |     |     |     |        |
| HvXTH15            | VNGDGG...DREQRLSLWFDPAADFHEYKILWNPYHLV...ILVDVDP IR VLRNLTGQV    |     |     |     |        |
| 2UWA               | IEGSGDYN.IIGREMRIHLWFDPTQDYHNYAIYWTSEII...FFVDDVP IR RYPRK...A   |     |     |     |        |
| HvXTH10            | VRGTGDAHPIVGREMRHFLWFDPTAAAFHHYAVLWNPDEIV...FLVDVDP VR RYQK...A  |     |     |     |        |
| HvXTH16            | VRGSGDGR.IIGREMRHFLWFDPTAGFHNYAILWNPDAIT...FFVDDVP IR RYERK...A  |     |     |     |        |
| HvXTH12            | GNGGST...SRGREERYLLFPDPTLAAHRYSIWAPTHII...FYVDGTAIR EVVRHP...G   |     |     |     |        |
| HvXTH9             | GDGST...AVGREERYGLWFDPTDHFHRYAILWNTNRTIV...FYVDGTP IR EVVRSE...A |     |     |     |        |
| HvXTH11            | GNGGST...GAGREERYDLFPDPTDHFHYSILWNTQHRIC...FYVDETP IR EVVRTE...A |     |     |     |        |
| HORVU4Hr1G085940.2 | QNKER...TDRIARISLY...CWMASSVI.CASLVE...LGE LKRLS...              |     |     |     |        |

|                    | 170         | 180        | 190       | 200              | 210                     |
|--------------------|-------------|------------|-----------|------------------|-------------------------|
| HvEG16_Hordeum_vul | .G.EEPWPE.K | PMFLYASFW  | DASGVDEGR | WTGTYHGR         | .....DAPYVCSYRDVRVP.VA  |
| TaEG16_Triticum_ae | .....       | .....      | .....     | .....            | .....                   |
| TaEG16_Triticum_ae | .G.EPWPPE.K | PMFLYASFW  | DASGVDEGR | WTGTYHGR         | .....DAPYVCSYRDVRVP.VA  |
| OsEG16_Oryza_sativ | .G.EPWPPE.K | PMFLYASVWD | ASHINDGK  | WTGTYHGR         | .....DAPYVCSYRDIRVP.LA  |
| OsEG16_Oryza_sativ | .G.EPWPPE.K | PMFLYASVWD | ASHINDGK  | WTGTYHGR         | .....DAPYVCSYRDIRVP.LA  |
| OsEG16_Oryza_sativ | .G.EPWPPE.K | PMFLYASVWD | ASHINDGK  | WTGTYHGR         | .....DAPYVCSYRDIRVP.LA  |
| TaEG16_Triticum_ae | .G.EPWPPE.K | PMYLYASLWD | ASDVDEGR  | WTGTYHGR         | .....DAPYVCSYRDVRVP.VA  |
| ZmEG16_Zea_mays_GR | .G.EPWPPE.K | PMYLYASVWD | ASHIADGA  | WTGTYHGR         | .....DEPYVCSYKDVRVP.TAE |
| ZmEG16_Zea_mays_NP | .G.EPWPPE.K | PMYLYASVWD | ASHIADGA  | WTGTYHGR         | .....DEPYVCSYKDVRVP.TAE |
| ZmEG16_Zea_mays_Zm | .G.EPWPPE.K | PMYLYASVWD | ASHIADGA  | WTGTYHGR         | .....DEPYVCSYKDVRVP.TAE |
| VvEG16             | .G.EGFPQ.K  | PMFLYASVWD | ASYIDEGR  | WTGPYVGC         | .....DAPYICLYKNVNP.VG   |
| PtEG16             | .G.EGFPPE.K | PMFLYASVWD | ASYICDAT  | WTGPYVGC         | .....DAPYVCLYKIDICVP.VG |
| 1UN1               | LG.VKFPFNQ  | PMKIYSLWN  | ADD.....  | W.ATRGGLEK.TDWSK | APFIASYSRFHI..DG        |
| HvXTH8             | LG.VRYPFDQ  | PMKLYSLWN  | ADD.....  | W.ATRGGLEK.TDWSK | APFVASYSRFHI..DG        |
| HvXTH22            | NG.VPFPTRQ  | PMHVFASLWN | ADD.....  | W.ATQGGVVK.TDWSK | APFVASYSRFHI..DG        |
| HvXTH20            | KG.IAFPKNQ  | PMRLYSLWN  | ADD.....  | W.ATQGGVVK.TDWSK | APFVASYSRFHI..DG        |
| HvXTH19            | KG.IAFPKNQ  | PMRLYSLWN  | ADD.....  | W.ATQGGVVK.TDWSK | APFVASYSRFHI..DG        |
| HvXTH18            | KG.IAFPKNQ  | PMRLYSLWN  | ADD.....  | W.ATQGGVVK.TDWSK | APFVASYSRFHI..DG        |
| HvXTH17            | KG.IAFPKNQ  | PMRLYSLWN  | ADD.....  | W.ATQGGVVK.TDWSK | APFVASYSRFHI..DG        |
| HvXTH23            | RG.VSFPKQ   | PMRLYSLWN  | ADD.....  | W.ATQGGVVK.TDWSK | APFVASYSRFHI..DG        |
| HvXTH21            | TG.VPYLRSQ  | PMRVYASVWD | ADD.....  | W.ATQGGVVK.TDWSK | APFVASYSRFHI..DG        |
| HvXTH24            | NG.SPYPNYQ  | PMRVFSTIWN | ADD.....  | W.ATQGGVVK.TDWSK | APFVASYSRFHI..DG        |
| HvXTH3             | PN.KFPIMK   | PMYVFSIWN  | ADD.....  | W.ATRGGLEK.TDWSK | APFVASYSRFHI..DG        |
| HvXTH13            | HG.VAFPQ    | PMRLHGLWN  | ADD.....  | W.ATQGGVVK.TDWSK | APFVASYSRFHI..DG        |
| HvXTH4             | HG.VPFPQ    | PMRVYASVWD | ADD.....  | W.ATQGGVVK.TDWSK | APFVASYSRFHI..DG        |
| HvXTH14            | .G.LPFPSSQ  | PMTHATLWD  | DGSY..... | W.ATRGGVVK.TDWSK | APFVASYSRFHI..DG        |
| HvXTH1             | .D.LPYPSSQ  | PMTHATLWD  | DGSY..... | W.ATRGGVVK.TDWSK | APFVASYSRFHI..DG        |
| HvXTH6             | .G.LPYPTSK  | PMRLHATLWD | DGSY..... | W.ATRGGVVK.TDWSK | APFVASYSRFHI..DG        |
| HvXTH5             | .G.LPYPTSK  | PMRLHATLWD | DGSY..... | W.ATRGGVVK.TDWSK | APFVASYSRFHI..DG        |
| HvXTH7             | .G.LPYPTSK  | PMRLHATLWD | DGSY..... | W.ATRGGVVK.TDWSK | APFVASYSRFHI..DG        |
| HvXTH2             | HG.VAFPQ    | PMRLHATLWD | DGSY..... | W.ATRGGVVK.TDWSK | APFVASYSRFHI..DG        |
| HvXTH15            | AE.YEFPQ    | PMRLHATLWD | DGSY..... | W.ATRGGVVK.TDWSK | APFVASYSRFHI..DG        |
| 2UWA               | SD.ATFPL    | RLWVYGSVWD | ASS.....  | W.ATRGGVVK.TDWSK | APFVASYSRFHI..DG        |
| HvXTH10            | VE.ATFPE    | RMWYGSVWD  | ASS.....  | W.ATRGGVVK.TDWSK | APFVASYSRFHI..DG        |
| HvXTH16            | TE.LTFPD    | RMWYGSVWD  | ASS.....  | W.ATRGGVVK.TDWSK | APFVASYSRFHI..DG        |
| HvXTH12            | MG.GDFFA    | KPMAYATLWD | DGSA..... | W.ATRGGVVK.TDWSK | APFVASYSRFHI..DG        |
| HvXTH9             | MG.AQFPS    | KPMAYATLWD | DGSA..... | W.ATRGGVVK.TDWSK | APFVASYSRFHI..DG        |
| HvXTH11            | MG.AAFPS    | KPMAYATLWD | DGSA..... | W.ATRGGVVK.TDWSK | APFVASYSRFHI..DG        |
| HORVU4Hr1G085940.2 | .G.EEPWPE.K | PMFLYASFW  | DASGVDEGR | WTGTYHGR         | .....DAPYVCSYRDVRVP.VA  |

|                    | 220                  | 230                            | 240                         |
|--------------------|----------------------|--------------------------------|-----------------------------|
| HvEG16_Hordeum_vul | LSTEEEEEECQ.....     | DDADAGDEAD.....                | AAGAAEE...EEE.              |
| TaEG16_Triticum_ae | .....                | .....                          | .....                       |
| TaEG16_Triticum_ae | LSAEEEEEEEE.....     | .....                          | .....                       |
| OsEG16_Oryza_sativ | LSLEDEEDPYKCA        | CVGDASAAIAAADAAEQVDAGDAPA..... | AAAAADA...AEEV              |
| OsEG16_Oryza_sativ | LSLEDEEDPYKCA        | CVGDASAAIAAADAAEQVDAGDAPA..... | AAAAADA...AEEV              |
| OsEG16_Oryza_sativ | LSLEDEEDPYKCA        | CVGDASAAIAAADAAEQVDAGDAPA..... | AAAAADA...AEEV              |
| TaEG16_Triticum_ae | LSAGEEEEEWQ.....     | DDTNAGDEAD.....                | AAATTCE...D..               |
| ZmEG16_Zea_mays_GR | HSVED.....           | AAHAPAGDPPIA.....              | AEAAAAA...EE..              |
| ZmEG16_Zea_mays_NP | HSVED.....           | AAHAPAGDPPIA.....              | AEAAAAA...EE..              |
| ZmEG16_Zea_mays_Zm | HSVED.....           | AAHAPAGDPPIA.....              | AEAAAAA...EE..              |
| VvEG16             | TAVE.....            | .....                          | .....                       |
| PtEG16             | TAVEC.....           | .....                          | .....                       |
| 1UN1               | C.....               | EASVEAK.....                   | FCATQG...ARWW               |
| HvXTH8             | C.....               | EASAEAK.....                   | LCATQG...ARWW               |
| HvXTH22            | CVW.....             | HGGASPT.....                   | RCGGDHLPSASSWM              |
| HvXTH20            | CVVTAGGRPH...CG..... | A.....                         | SVGTDVAP...GTGAA...GEWY     |
| HvXTH19            | CVVTAGGRPR...CG..... | A.....                         | SVGTDVAP...GTGAA...GEWY     |
| HvXTH18            | CVVTAGGRPR...CG..... | A.....                         | SMGTEAAP...GTGASGA...AGEWY  |
| HvXTH17            | CVVTAGGRPR...CG..... | A.....                         | SIGTDAAAP...GTGASGA...AGEWY |
| HvXTH23            | CVMS.GGAQR...C.....  | .....                          | PAGTMEAS...AAGG...GSWW      |
| HvXTH21            | C.....               | ASQDAA.....                    | ACANSN...GAWM               |
| HvXTH24            | C.....               | SQGQNSN.....                   | VCGQSSP...NGLF              |
| HvXTH3             | CAW.....             | PSGPAPP.....                   | ACAAATG...DSWW              |
| HvXTH13            | C.....               | RSPSPGVA.....                  | WCGDEPPG...STWF             |
| HvXTH4             | C.....               | RSPSPGVS.....                  | WCGAEPAG...SPVF             |
| HvXTH14            | CVH.....             | DKATNKT.....                   | SCPAGS...DAWM               |
| HvXTH1             | CVS.....             | NGGS.S.....                    | ACPAGS...DAWM               |
| HvXTH6             | CVS.....             | G.....                         | ACHAGS...DRWM               |
| HvXTH5             | CVS.....             | G.....                         | ACHAGS...DRWM               |
| HvXTH7             | CAS.....             | G.....                         | ACHAGS...DGWM               |
| HvXTH2             | C.....               | E.C.....                       | YGGDCVY...TCA...GAFR        |
| HvXTH15            | C.....               | DNAS.....                      | STPCDST...DLWW              |
| 2UWA               | CTV.....             | EAAS.....                      | SCN...PASV                  |
| HvXTH10            | CEV.....             | GAPP.....                      | SCR...PVPA                  |
| HvXTH16            | CGP.....             | GAPP.....                      | SCR...PVPA                  |
| HvXTH12            | CRV.....             | ADPASPALRLAGGDGCDLLGL...       | MTADY                       |
| HvXTH9             | CAS.....             | HDRAQPA.....                   | SC.....                     |
| HvXTH11            | CPVNR.....           | IY.....                        | HSAA.A...ACG...TPWY         |
| HORVU4Hr1G085940.2 | .....                | .....                          | AVGLLQLA.....               |

```

HvEG16_Hordeum_vul      .....EMDAGDGED.....
TaEG16_Triticum_ae      .....
TaEG16_Triticum_ae      .....
OsEG16_Oryza_sativ      D....AGDAPAATAAADVAAEQ.....VDAGDVPASAAAADAVKEVDAGAGKD....
OsEG16_Oryza_sativ      D....AGDAPAATAAADVAAEQ.....VDAGDVPASAAAADAVKEVDAGAGKD....
OsEG16_Oryza_sativ      D....AGDAPAATAATDVAAEQ.....VDAGDVPASAAAADAVKEVDAGAGKD....
TaEG16_Triticum_ae      .....
ZmEG16_Zea_mays_GR      .....EKDAGASEV.....
ZmEG16_Zea_mays_NP      .....EKDAGAGEV.....
ZmEG16_Zea_mays_Zm      .....EKDAGA.....
VvEG16                  .....SCDS.....
PtEG16                  .....
1UN1                    DQKEFQDLDADFQYRRLSWVRQ.KYTIYNYCTDR...SRYPS..MPPECKRD.....
HvXTH8                  DQPEFQDLDAAQYRRLLWVRK.EHTIYNYCTDR...ERYAA..MSPECKRD.....
HvXTH22                 G....QRLDWWSWMTLNWVRM.NYMTYDYCADR...KRYPH.GFPAECIIPIGRI....
HvXTH20                 N....QELDLTRQQRMRWVQS.NYMIYNYCTDP...KRFAQ.GVPAECSM.....
HvXTH19                 N....QELDLTRQQRMRWVQS.NYMIYNYCTDP...KRFAQ.GVPAECSM.....
HvXTH18                 N....QELDLTLQQRMRWVQS.NYMIYNYCTDP...KRVAQ.GVPAECSLPRP....
HvXTH17                 N....QELDLTRQQRMRWVQS.NYMIYNYCTDP...KRVAQ.GVPAECSLPRP....
HvXTH23                 N....QELSGMGYRRMRWVRQ.KFMIYNYCTDP...KRVAQ.GVPAECKLR.....
HvXTH21                 Y....QELDATAALDRLQWVK.NYMIYNYCTDT...WRFKD.GAPPCCASK.....
HvXTH24                 N....QQQDQMQQQQVKEVDA.KYKVYDFCDDS...KRRI..GSSECQSQ....
HvXTH3                  DQPPAWALDDGQRDSGWVAR.NLVIYDYCGDR...KRFT..VPECALRTTTS....
HvXTH13                 E....RGLDA...AALRRARD.AHMIYDYCKDL...QRYKGSGLPKC...VVD.....
HvXTH4                  N....LAPKARADMOWVRDMGYVIYDYCTDR...SNRYNDTTRPKEC...SLPRP....
HvXTH14                 H....RELDGELSTVAVAAER.NCLSYNYCADG...WRFPK.GFPGE...CGRK.....
HvXTH1                  S....TELDKALGTVAWAES.KYMSYDYCTDG...WRFPN.GFPAEC...SRN.....
HvXTH6                  R....KQLDGEWGTVKWAER.SYMRNYNCEDG...YRFPO.GLPAEC...NRY....
HvXTH5                  K....KQLDGAEWGTVKWAER.SYMRNYNCEDG...YRFPO.GLPAEC...NRY....
HvXTH7                  N....RQLDGEWGTVKWAER.SYMRNYNCEDG...YRFPO.GFPAEC...SRY....
HvXTH2                  G...CGGLTGDRGKMQWVQD.NYRIYDYCADHE..AGKVPG...VECSLPQY....
HvXTH15                 NARRHRRLSVREQAAYENVRR.TYMNIDYCADK...DRFQNGKLPV...CSYTT....
2UWA                   S..P.YGQLSQQVAAAMEWVQK.NYMVYNYCDP...TRDHT..LTP...EC.....
HvXTH10                 G..P.GGGLSAQQSAAMSWAQQ.RAMVYYYCQDG...SKDRS..NYP...EC.....
HvXTH16                 S..P.VGTGLTRQYYAAMRWVQK.RHMYYYYCQDF...RRDRS..LTP...EC.....
HvXTH12                 ....AVMTPQKRAAMRAFR.ARMITYTVCYDA...ARYAA.GPFP...CDNSDEERGTFW
HvXTH9                  E..P..EGMPARQRAAMERVRA.RHMTYGYCYDR...ARYPA..PLP...CRVGAEEA.MYL
HvXTH11                 E..P.VAAALSGEQRASMSAFRR.GHMSYSYCHDR...RRYPV..ALS...CDVAVLPR.LFG
HORVU4Hr1G085940.2    ..P..KKVTPRVTGAFGFVTS.....LISCYQQ...LPARAPL.....

```

```

HvEG16_Hordeum_vul      .....
TaEG16_Triticum_ae      .....
TaEG16_Triticum_ae      .....
OsEG16_Oryza_sativ      .....
OsEG16_Oryza_sativ      .....
OsEG16_Oryza_sativ      .....
TaEG16_Triticum_ae      .....
ZmEG16_Zea_mays_GR      .....
ZmEG16_Zea_mays_NP      .....
ZmEG16_Zea_mays_Zm      .....
VvEG16                  .....
PtEG16                  .....
1UN1                    .....RDI.....
HvXTH8                  .....RDV.....
HvXTH22                 .....
HvXTH20                 .....
HvXTH19                 .....
HvXTH18                 .....
HvXTH17                 .....
HvXTH23                 .....
HvXTH21                 .....
HvXTH24                 .....
HvXTH3                  .....
HvXTH13                 .....
HvXTH4                  .....
HvXTH14                 .....
HvXTH1                  .....
HvXTH6                  .....
HvXTH5                  .....
HvXTH7                  .....
HvXTH2                  .....
HvXTH15                 .....
2UWA                   .....
HvXTH10                 .....
HvXTH16                 .....
HvXTH12                 AWGESKTVVMKTRGRGRGRGSRAGAGARGRAGAASS
HvXTH9                  PSGEA.....RSSDRR.R.....HGKRHRRADSAL
HvXTH11                 PDGMK.....YGGDRRHR.....RGGRRRSDVVM
HORVU4Hr1G085940.2    .....AKVKA

```
